# Supplementary material for: Laboratory animals search filter for different literature databases: PubMed, Embase, Web of Science and PsycINFO
Source: PubMed Central journal article supplement — Lab Anim. 2021 Sep 24;56(3):279–86. doi: 10.1177/00236772211045485 (PMC9194806; doi:10.1177/00236772211045485), 2021-09-24
Supplement: sj-pdf-4-lan-10.1177_00236772211045485.pdf [file sj-pdf-4-lan-10.1177_00236772211045485.pdf]

PsycInfo via psycnet.apa.org animal filter: Copy first part in the search field searching for "index terms". Copy the second part into two search fields, search one for "keywords" and one for "abstracts". Combine all searches using "OR"

1.

{animals} OR {Animal Models} OR {Animal Research} OR {Female Animals} OR {Male Animals} OR {Infants (Animal)} OR {vertebrates} OR {Amphibia} OR {Birds} OR {Fishes} OR {Mammals} OR {Pigs} OR {Reptiles} OR {Octopus} OR {Frogs} OR {Salamanders} OR {Toads} OR {Blackbirds} OR {Budgerigars} OR {Canaries} OR {Chickens} OR {Doves} OR {Ducks} OR {Geese} OR {Owls} OR {Penguins} OR {Pigeons} OR {Quails} OR {Robins} OR {Sea Gulls} OR {Bass (Fish)} OR {Carp} OR {Cichlids} OR {Electric Fishes} OR {Salmon} OR {Sticklebacks} OR {Bats} OR {Canids} OR {Cattle} OR {Chimpanzees} OR {Chinchillas} OR {Deer} OR {Elephants} OR {Felids} OR {Goats} OR {Horses} OR {Lemurs} OR {Marsupials} OR {Primates (Nonhuman)} OR {Rabbits} OR {Rodents} OR {Seals (Animal)} OR {Sheep} OR {Whales} OR {Crocodilians} OR {Lizards} OR {Snakes} OR {Turtles} OR {Goldfish} OR {Dogs} OR {Foxes} OR {Wolves} OR {Cats} OR {Kangaroos} OR {Opossums} OR {Baboons} OR {Bonobos} OR {Gorillas} OR {Monkeys} OR {Beavers} OR {Gerbils} OR {Guinea Pigs} OR {Hamsters} OR {Mice} OR {Minks} OR {Rats} OR {Squirrels} OR {Voles} OR {Dolphins} OR {Porpoises} OR {Norway Rats}

2.

rat OR rats OR animal OR animals OR mice OR "in vivo" OR mouse OR rabbit OR rabbits OR murine OR pig OR pigs OR dog OR dogs OR bovine OR fish OR vertebrate OR vertebrates OR cat OR cats OR rodent OR rodents OR mammal OR mammals OR chicken OR chickens OR monkey OR monkeys OR sheep OR canine OR canines OR porcine OR cattle OR bird OR birds OR hamster OR hamsters OR primate OR primates OR cow OR cows OR chick OR horse OR horses OR avian OR avians OR calf OR swine OR swines OR xenopus OR turkeys OR bear OR bears OR frog OR frogs OR zebrafish OR goat OR goats OR equine OR calves OR poultry OR macaque OR macaques OR mole OR moles OR ovine OR lamb OR lambs OR fishes OR diptera OR amphibian OR amphibians OR snake OR snakes OR ruminant OR ruminants OR hen OR hens OR piglet OR piglets OR feline OR felines OR simian OR simians OR laevis OR trout OR trouts OR teleost OR teleosts OR salmon OR salmons OR seal OR seals OR bull OR bulls OR ewe OR ewes OR hedgehog OR hedgehogs OR macaca OR macacas OR proteus OR pigeon OR pigeons OR bat OR bats OR duck OR ducks OR chimpanzee OR chimpanzees OR baboon OR baboons OR deer OR rana OR ranas OR carp OR carps OR heifer OR swallow OR swallows OR lizard OR lizards OR canis OR sow OR sows OR cynomolgus OR quail OR quails OR reptile OR reptiles OR turtle OR turtles OR buffalo
